# Supplementary material
Source: publisher figshare collection journal article supplement (https://tandf.figshare.com/ndownloader/files/36009317)
Supplement: Supplementary file 1 [file 36009317]

**APPENDIX C: Comparative table of the terms of the SGCPs in France and Germany (for SMEs)**

|  | **Total amount of state's guarantee** | **Level of the guaranteed** | **Interest rate** | **Price of guarantee** | **Banks' fees** | **Recovery procedure for NPLs** |
| --- | --- | --- | --- | --- | --- | --- |
| **France** | €300 bn | 90% | Cost price | 0.25% for the first year, then 0.5% and 1% (at the charge of the bank for the first year) | None | At the charge of the banks |
| **Germany** | No limit | “Special programs” - 90%  “Instant loans” - 100% | “Special programs” -  between 1 and 1.5%, then varying with market developments  “Instant loans” - 3% | Included in interest rates | €1000 per application + 0.2% of loan amount per year | At the charge of the banks – with an incentive of receiving 9% of the recovered amount |
